# Supplementary material for: A randomized cross-over study of the acute effects of running 5 km on glucose, insulin, metabolic rate, cortisol and Troponin T
Source: PLoS One. 2017 Jun 16;12(6):e0179401. doi: 10.1371/journal.pone.0179401 (PMC5473541; doi:10.1371/journal.pone.0179401)
Supplement: S6 File — (XLSX) [file pone.0179401.s006.xlsx]

## Sheet: Blad1
height	weight
1.72	59.4
1.69	66.9			Alla data sorted according to the same vertical order of participants
1.6	50.3
1.93	80
1.61	61
1.81	64.2
1.84	70.6
1.77	72
1.82	78
1.82	69
1.63	66
1.8	72
1.85	80
1.66	54
1.86	82
1.87	86
1.69	81
non race day data							race day data
830	915	1105	1245	1430	1735		830	915	1105	1245	1430	1735		time
plasma glucose
4.4		6.1	4.7	4.3	4.6		5.1	7.1	5.5	4.2	4.4	4.1
4.8	4.7	2.9	5.1	4.3	4.6		4.6	7.2	5.1	4.5	4.6	4.5
4.5	4.4	4.8	5.9	4.7	4.6		4.5	6.3	4.5	4.1	4.6	3.9
3.9	4.4	6.2	5.7	4.3	4.2		5.4	5.7	5.1	5	4.8	5.2
4.8	4.6	0.3	5.9	5.3	5.3		4.6	5.4	5.1	4.6	4.3	4.4
5.1	4.7	6.4	5.2	5.3	6.3		4.9	5.2	4.3	5.5	3.8	5.8
4.5	3.9	5.1	4.9	4.2	4.2		5.3	5.8	5.6	5.3	5.1	4
5.5	5	6.5	5	5.1	4.8		5.2	7.4	6.6	5.9	5.3	4.9
6.7	5.5	6.4	6.2	4.3	5.6		5.6	5.6	6.1	6.2	5	5.2
5.3	4.6	4.2	4.8	4.2	4.7		4.7	4.9	5.6	5.5	6.3	5.4
4.4	4.7	4.7	5.2	5.1	4.1		4.4	7.7	6.1	6.3	5	4.2
5.5	6.4	5.8	5.4	5.2	4.6		5.2	5.3	5.3	4.8	5.2	4.8
5.1	5.5	6.3	5.3	5.3	5.7		5.2	6.1	7	5.6	5.2	5.1
4.9	4.4	5.1	5.6	6	4.7		5.2	7.9	6.2	6.2	6	4.9
6.1	5.3	5.8	5.8	5.4	5.8		5.6	9.9	5.9	5.4	4.8	5
4.8	5	4	4.4	4.4	4.6		4.8	6.3	5.2	5	4.4	4.6
4.7	5	4.8	4.5	5	4.9		4.9	5	6.4	4.8	5	5.3
serum insulin
35	12	248	55	49	32		40	168	242	55	44	30
7	24	68	48	46	17		28	119	89	47	45	12
47	34	138	101	136	14		57	98	101	85	68	32
51	47	394	353	136	59		93	112	239	115	137	114
31	39	220	239	161	27		49	109	136	53	70	45
28	16	148	31	42	62		29	27	110	35	75	62
29	22	163	55	45	30		27	44	193	124	86	21
53	53	291	110	88	36		35	90	238	89	148	16
32	28	190	108	77	27		31	44	152	56	75	17
23	17	73	73	51	13		12	19	162	10	76	23
49	47	151	84	118	53		38	214	206	114	68	47
34	23	101	44	48	19		45	63	131	34	32	46
57	58	137	30	101	59		84	131	198	66	87	52
22	24	151						139	199	97	140	24
38	42	77	21	71	14		29	40	145	26	76	19
38	42	77	21	71	14		29	40	145	26	76	19
37	38	166	49	44	44		44	47	280	35	144	26
serum cortisol
534	666	514	264	189	102		343	596	343	158	113	128
451	580	360	180	126	209		476	617	294	201	104	221
259	190	156	124	126	90		363	378	259	172	211	79
624	413	180	342	142	46		381	745	412	157	331	139
267	170	133	172	255	56		338	655	371	160	102	161
373	320	392	225	391	158		549	639	351	302	414	86
396	359	241	154	131	163		371	591	300	176	125	194
356	462	322	223	194	174		475	709	460	251	168	260
302	442	193	127	143	97		453	441	280	364	144	101
447	342	334	193	255	120		420	638	361	505	476	206
631	744	501	357	282	155		757	1070	790	591	400	215
405	335	254	181	144	125		381	561	280	196	202	222
240	353	329	229	174	275		413	722	385	225	238	301
746	700	460	483	289	122		555	959	510	413	233	166
212	149	165	203	110	72		254	580	316	143	78	86
212	149	165	203	110	72		254	580	316	143	78	86
353	332	139	174	388	155		156	461	240	159	162	178
QUICKI
0.38		0.27	0.35	0.36	0.38		0.36	0.28	0.28	0.35	0.36	0.39
0.5	0.4	0.36	0.35	0.36	0.42		0.39	0.29	0.32	0.36	0.36	0.45
0.36	0.38	0.3	0.31	0.3	0.44		0.35	0.31	0.32	0.33	0.34	0.39
0.36	0.36	0.26	0.26	0.31	0.35		0.31	0.3	0.28	0.31	0.3	0.31
0.38	0.37		0.28	0.29	0.38		0.35	0.31	0.3	0.35	0.34	0.36
0.38	0.42	0.29	0.37	0.35	0.33		0.38	0.38	0.32	0.36	0.34	0.33
0.39	0.41	0.29	0.34	0.36	0.39		0.38	0.35	0.28	0.3	0.32	0.42
0.34	0.34	0.27	0.31	0.32	0.37		0.37	0.3	0.27	0.31	0.3	0.42
0.36	0.38	0.28	0.3	0.33	0.38		0.37	0.35	0.29	0.33	0.33	0.41
0.39	0.42	0.34	0.33	0.36	0.44		0.45	0.41	0.29	0.45	0.32	0.39
0.36	0.35	0.3	0.32	0.31	0.36		0.37	0.27	0.28	0.3	0.33	0.36
0.36	0.38	0.31	0.35	0.35	0.41		0.35	0.33	0.3	0.37	0.37	0.35
0.34	0.34	0.29	0.37	0.31	0.33		0.32	0.3	0.28	0.33	0.32	0.34
0.4	0.4	0.3						0.28	0.28	0.31	0.29	0.39
0.35	0.35	0.32	0.39	0.33	0.42		0.37	0.33	0.29	0.38	0.33	0.41
0.37	0.36	0.34	0.41	0.34	0.44		0.38	0.35	0.3	0.39	0.33	0.41
0.37	0.36	0.3	0.35	0.35	0.36		0.36	0.35	0.27	0.37	0.3	0.38
salivary cortisol
8.2	35.9	20.1	6.3	2.9	2		11.2	21.3	10.8	3.5	2.7	2.5
6.5	41.5	12.3	4	2.6	4.9		15	30	8.4	3.6	2.4	5.1
7	5.2	4.7	4	4	2.1		12.4	16.7	9.4	5.2	5	2.5
6.7	8.9	4.5	10	3.3	1.5		9.7	44.7	18.4	4.8	14.5	4.3
5.2	2.6	4.3	3	4.3	1.5		8.9	24.6	10.7	3.6	2.6	5.2
10.3	5.6	11.5	3.5	11.4	2.7		20.7	23.3	8.7	7.1	15.2	1.8
10.7	7.8	5.5	3.1	3.6	3.6		8.4	15.6	7.4	3.3	2.7	3.7
6.7	8.1	8.6	3.6	4.2	2.9		6.2	19.4		3.9	3	3.3
6.1	11.7	4.3	2	2.4	1.5		10.4	10.4	5.9	6.6	2.9	1.8
18.7	11.9	9.8	5.3	6.1	3		12.5	49.2	11.8	7.2	25.5	4.4
15.9	32.4	12.2	6.3	4.4	2.6		20.9	30.6	25.5	9.4	6.2	2.9
11.7	9.9	5.9	3.7	3.1	2.5		13.3	20.5	8.4	4.9	3.6	5
4.2	6.1	5.2	4.5	3	3.4		6	30.4	7.5	2.7	3.6	3.1
24	21.7	8.3	4.8	7.8	3		16.7	18.4	17.7	7	4.6	2.3
7.5	4.3	6.1	5.2	3.6	3.2		9.3	20.9	12.4	3.8	3.1	2.5
5.3	3.6	3.3	4.4	3	1.9		6.6	20.4	6.7	2.8	2.2	2.2
5.9	12.8	3.3	3.4	3.1	2.6		3.6	12.6	5.2	3.7	2.7	3.2
Troponin T, values of 2.5 corresponds to undetectable levels
							2.5	2.5	9	13	14	8
							2.5	2.5	19	27	21	12
							2.5	2.5	2.5	2.5	2.5	2.5
							2.5	2.5	18	29	32	21
							2.5	2.5	9	13	10	2.5
							2.5	2.5	2.5	2.5	2.5	2.5
							2.5	2.5	2.5	12	11	6
							2.5	2.5	2.5	2.5	2.5	2.5
							2.5	2.5	2.5	2.5	2.5	2.5
							2.5	2.5	2.5	2.5	2.5	2.5
							2.5	2.5	8	8	6	2.5
							2.5	2.5	8	8	9	9
							2.5	2.5	6	6	5	2.5
							2.5		7	7	5	2.5
							2.5	2.5	6	6	2.5	7
							2.5	2.5	7	16	17	12
							2.5	2.5	2.5	7	6	6
Metabolic rate
non-race day data						race-day data
8	10.05	14.05	17.3			8	10.05	14.05	17.3	time points
1258	1775	1417	1417			1255	1993	1622	1495
1520	1938	1850	1565			1610	1962	1880	1600
1312	1608	1422	1305			1212	1723	1628	1385
1793	1993	1942	1817			1780	2258	1904	1860
	1863	1768	1647			1397	1892	1618	1550
1892	2237	2052	2258			1913	2322	2185	2128
1795	2210	2015	1952			1817	2427	1932	1747
1672	2128	1925	1698			1683	2242	1960	1710
1743	2123	2010	1880			1757	2443	2022	1778
1828	2293	2292	2105			1810	2670	1987	1985
1452	1857	1648	1657			1527	2023	1705	1572
1787	2073	2047	1827			1735	2355	2012	1965
1882	2158	1955	1768			1818	2310	2160	2082
1518	1617	1515	1441			1358	1762	1648	1455
2062	2325	2338	2213			2063	2750	2405	2205
2028	2510	2297	1998			2062	2648	2400	1944
1797	2043	2193	2045			1997	2387	2518	2320
